# Incidence and Progression of Diabetic Retinopathy in Hispanics and Non-Hispanic Whites With Type 2 Diabetes

San Luis Valley Diabetes Study, Colorado

STEPHANIE M. TUDOR, MSPH  
RICHARD F. HAMMAN, MD, DRPH  
ANNA BARON, PHD

DAVID W. JOHNSON, MD  
SUSAN M. SHETTERLY, MS

**OBJECTIVE** — To learn if Hispanic people with type 2 diabetes have excess incidence and/or progression of diabetic retinopathy and to explore the association of risk factors with diabetic retinopathy.

**RESEARCH DESIGN AND METHODS** — There were 244 subjects with type 2 diabetes (65.3% Hispanic) with at least one follow-up visit between 1984 and 1992 examined for the development of retinopathy over a median of 4.8 years (range 2.0–6.6 years). Stereo fundus photos were graded by the University of Wisconsin Reading Center.

**RESULTS** — Of the 169 subjects without retinopathy at baseline, 47 developed some retinopathy, an incidence rate of 63.7 per 1,000 person-years (PY), or a 4-year cumulative incidence of 22.5%. The Hispanic incidence rate was 58.3/1,000 PY (95% CI: 39.4–83.3), which was lower than among non-Hispanic whites, 76.1/1,000 PY (44.3–121.9). Progression occurred in 24 of the 75 subjects with retinopathy at baseline, a 4-year cumulative rate of 24.1%. Logistic regression showed that insulin treatment was associated with higher risk of any retinopathy (odds ratio [OR] = 8.45, 2.65–26.97), and both systolic blood pressure (odds ratio [OR] = 1.58, 0.99–2.52) and total GHb (OR = 1.46, 0.99–2.17) nearly attained statistical significance. After adjustment for multiple potential risk factors, the Hispanic/non-Hispanic white OR was 0.66 (0.28–1.57).

**CONCLUSIONS** — No excess risk for incident retinopathy was found among Hispanic compared with non-Hispanic white subjects in this population. These results are consistent with our previously reported prevalence data from the same population but differ from reports of excess prevalence among Texas Hispanics. No other Hispanic incidence data are available to assist in reconciling this difference.

Diabetic retinopathy has been recognized for several decades as one of the most prevalent complications of both non-insulin-dependent (type 2) and insulin-dependent (type 1) diabetes (1–4). With increases in the numbers of people with diabetes, retinopathy has become one of the foremost causes of new cases of blindness and vision loss in adults in the United States

(1,3). Study of the incidence and progression of diabetic retinopathy and associated risk factors is important in the prevention of its development and of the visual impairment caused by this complication.

Hispanics are known to have a two- to fourfold increased risk of type 2 diabetes compared with non-Hispanic whites (NHW) (5), but data comparing retinopa-

thy prevalence have been contradictory (4–6). Excess prevalence of retinopathy was noted in San Antonio Mexican-Americans (6), but a significant though small deficit among Hispanics compared with NHW subjects was seen in our previous prevalence study (4). No incidence data for diabetic retinopathy in these populations has been published. In the present study, the incidence and progression of diabetic retinopathy were examined to learn whether Hispanics had excess risk compared with NHWs with type 2 diabetes living in the San Luis Valley of Colorado. Because glucose control, hypertension, type of therapy, and diabetes duration, among other risk factors, are associated with diabetic retinopathy (1,4,6–20), we also examined these and other factors to see if they accounted for altered Hispanic-to-NHW incidence rates.

## RESEARCH DESIGN AND METHODS

### Population

The San Luis Valley Diabetes Study was undertaken to examine the prevalence and incidence of type 2 diabetes and to study risk factors for the development of type 2 diabetes and its complications. Methods and more details of the study design have been described in previous publications (4,21). People with diabetes were identified in three ways: 1) medical record review and community publicity identified people with prevalent diabetes ("known diabetes") during the baseline period from 1984–1986; 2) all community incident cases were identified from medical practices using active surveillance from 1986–1988; and 3) a stratified sample of 1,351 people not known to have diabetes was screened for diabetes using an oral glucose tolerance test, and 71 people were found to have diabetes. Of the 1,791 people who attended a baseline clinic visit, 430 (24%) were confirmed to have type 2 diabetes by World Health Organization criteria (22) or use of insulin

From the Department of Preventive Medicine and Biometrics (S.M.T., R.F.H., A.B., S.M.S.) and the Department of Ophthalmology (D.W.J.), University of Colorado School of Medicine, Denver, Colorado.

Address correspondence and reprint requests to Richard F. Hamman, MD, DrPH, University of Colorado School of Medicine, Department of Preventive Medicine and Biometrics, Box C-245, 4200 E. 9th Ave., Denver, CO 80262. E-mail: richard.hamman@uchsc.edu.

Received for publication 30 May 1997 and accepted in revised form 23 September 1997.

**Abbreviations:** HR, hazard ratio; NHW, non-Hispanic white; OR, odds ratio; PY, person-years; WESDR, Wisconsin Epidemiologic Study of Diabetic Retinopathy.

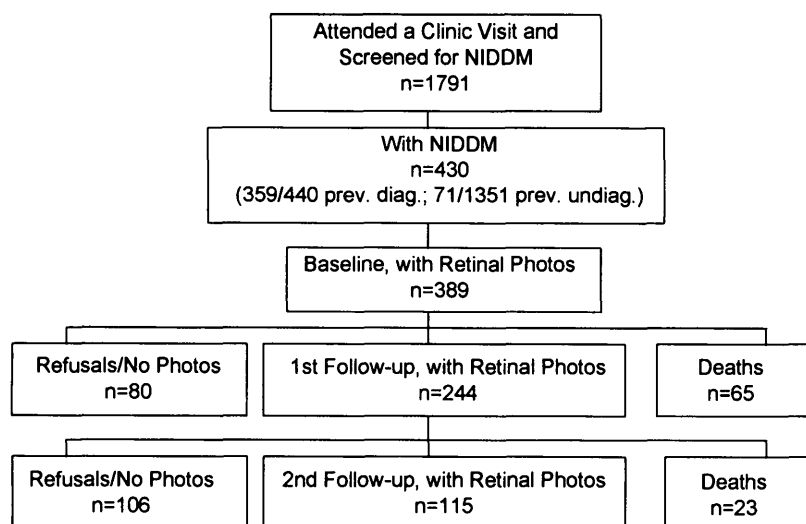

**Figure 1**—Participation in follow-up for retinopathy assessment in the San Luis Valley Diabetes Study, 1984–1992.

or oral agents. Subjects were classified as having type 1 diabetes if C-peptide levels were  $<0.1$  pmol/ml or lacking C-peptide levels, age at onset was  $<18$  years, and insulin treatment was for not less than all but 1 year of duration (21). Subjects with type 1 diabetes were removed from the study. Study subjects were Hispanic and NHW people, aged 20–74 years, who were current residents of Alamosa or Conejos counties in southern Colorado, who had type 2 diabetes at the baseline visit, and who spoke either English or Spanish.

The baseline visits occurred between May 1984 and August 1988. Of the total group screened, 430 people were identified with type 2 diabetes, and 389 subjects (172 men and 217 women) had retinal photographs at the baseline visit (90.5%) (Fig. 1). At the first follow-up visit an average of 4.8 years later (SD = 1.4, range 2.0–6.6), 252 subjects returned (64.8%). Of these people, 244 (96.8%) had gradable retinal photographs. Among the 145 people not returning, 65 had died (44.8%), 67 refused (46.1%), and 5 became ineligible due to terminal illness or inability to physically be transported to the clinic site (3.5%). Additionally, four subjects did not have photos taken, and four subjects had ungradable photos (5.6%). One hundred forty-three subjects completed a second follow-up visit an average of 5.4 years after baseline (58.6%), with a range of follow-up time from 3.9 to 6.5 years. Of these, 115 had gradable photographs (80.4%); 5 subjects had no photos at either visit (3.5%). Of the people not returning, 23 had died (21.7%)

and 83 refused (78.3%). Analyses presented here were restricted to those subjects identified with type 2 diabetes at the baseline visit, 1984–1988, and who had one or more follow-up visits with retinal photographs ( $n = 244$ ) between 1988 and 1992.

**Table 1**—Classification scheme for retinopathy severity and numbers of subjects by baseline severity category, San Luis Valley Diabetes Study, 1984–1992

| Grade  | Definition                                                                                                                                                                                                    | All subjects at baseline ( $n = 389$ ) | Subjects with follow-up photos ( $n = 244$ ) |
|--------|---------------------------------------------------------------------------------------------------------------------------------------------------------------------------------------------------------------|----------------------------------------|----------------------------------------------|
| 10, 12 | Normal fundus, or abnormal fundus not characteristic of DR                                                                                                                                                    | 250 (64.3)                             | 169 (69.3)                                   |
| 15     | Background DR with no MA but $\geq 1$ of the following: hemorrhage, soft exudates, or IRMA                                                                                                                    | 11 (2.8)                               | 7 (2.9)                                      |
| 20     | Background DR with MA only                                                                                                                                                                                    | 42 (10.8)                              | 27 (11.1)                                    |
| 30     | Background DR with MA and $>1$ of the following: hemorrhage and MA $<$ standard photo 2A,* $<3$ hard exudates, venous looping, questionable soft exudates, questionable IRMA, and questionable venous beading | 30 (7.7)                               | 21 (8.6)                                     |
| 40     | Preproliferative DR with MA and $\geq 1$ of the following: hemorrhage and MA $>2A$ ,* $<3$ hard exudates, soft exudates, IRMA, and venous beading                                                             | 39 (10.0)                              | 18 (7.4)                                     |
| 60     | Proliferative DR with fibrous proliferations but without new vessels                                                                                                                                          | 1 (0.3)                                | 0 (0.0)                                      |
| 65     | Proliferative DR with $\geq 1$ of the following: new vessels elsewhere, new vessel disk $<10A$ ,* preretinal hemorrhage, and vitreous hemorrhage                                                              | 13 (3.3)                               | 2 (0.8)                                      |
| 70     | Proliferative DR, high-risk characteristics                                                                                                                                                                   | 3 (0.8)                                | 0 (0.0)                                      |

Data are  $n$  (%). DR, diabetic retinopathy; MA, microaneurysms; IRMA, intraretinal microvascular abnormality. \*For definition, see references 25 and 26.

### Retinopathy classification

After pharmacological dilation of pupils, stereoscopic fundus photographs were taken of Diabetic Retinopathy Study fields I, II, and IV (23,24). These photographs were graded at the University of Wisconsin Fundus Photography Reading Center using the modified Airlie House Classification scheme (24). A summary classification scheme was used for assigning severity of retinopathy as the worst eye for each patient (Table 1) (4,25,26). The distribution of baseline retinopathy prevalence for all subjects seen at baseline ( $n = 389$ ) and those in this report with follow-up ( $n = 244$ ) are also shown in Table 1.

The incidence of any new retinopathy was estimated for all those who had no retinopathy at baseline examination ( $n = 169$ ) and who had at least one follow-up examination. Incidence and progression were defined as an increase in the retinopathy severity grade of two steps or more at either of the follow-up examinations. Regression, or improvement, of retinopathy was defined as a two-step or more decrease in the severity of retinopathy at the follow-up exam(s) in those subjects positive for any retinopathy at baseline ( $n = 75$ ).

## Risk factors

Subjects were interviewed by a bilingual interviewer masked to retinopathy status and examined by a trained nurse clinician. Ethnicity was defined by response to the question "Are you of Spanish or Hispanic origin or descent" from the 1980 U.S. Census (27). Family history of diabetes was positive if the subject reported that a parent or sibling had been diagnosed with diabetes. Subjects were classified as current, former, or never smokers at the time of each clinic visit based on a self-report. Those subjects who had smoked <100 cigarettes in their lifetime were considered to have never smoked. BMI was calculated as current weight (kg) divided by height (m<sup>2</sup>) in a scrub suit. Glycemia was assessed by the percentage of glycosylated hemoglobin (total GHb) present, determined by a micro-column method (ion-exchange chromatography; Quik-Sep Fast Hemoglobin Test System, Isolab, Akron, OH) at the baseline examination. Total GHb was measured at the follow-up visits using a finger-stick collection on filter paper that was mailed to the laboratory of Dr. David Goldstein, University of Missouri, for assay by affinity chromatography. Overall correlation between these two methods was  $r = 0.89$ , and the regression relationship was as follows: filter paper value =  $1.8 + 0.8$  (venous ion-exchange chromatography value) (28). The data from this second method, adjusted using the regression equation above, were used in Cox proportional hazards analysis, which incorporated follow-up data. Duration of diabetes was by self-report. Systolic and diastolic blood pressures were measured as the average of the last two of three fifth-phase supine measurements with a mercury sphygmomanometer. Hypertension was defined as having blood pressure >140 mmHg systolic and/or 90mmHg diastolic, or being on antihypertensive medication (29). Kidney function was assessed by total urine protein-to-creatinine ratio (30). Serum triglyceride levels were measured using an enzymatic procedure (31). Fasting serum cholesterol was measured by the esterase-oxidase method (32), and total HDL cholesterol was determined enzymatically following dextran sulfate magnesium precipitation (33).

## Statistical analysis

Incidence density calculations using person-years were completed for the entire group in follow-up and by ethnicity by accumulating all follow-up time until the

**Table 2—Summary of any two-step incidence, progression, and regression of diabetic retinopathy, San Luis Valley Diabetes Study, 1984–1992**

| Outcome     | No. at risk | No. with outcome | Cumulative 4-year incidence (%) | Incidence density per 1,000 PY (95% CI) |
|-------------|-------------|------------------|---------------------------------|-----------------------------------------|
| Incidence   | 169         | 47               | 22.5                            | 63.7 (46.3–84.7)                        |
| NHW         | 53          | 17               | 26.2                            | 76.1 (44.3–121.9)                       |
| Hispanic    | 116         | 30               | 20.8                            | 58.3 (39.4–83.3)                        |
| Progression | 75          | 24               | 24.1                            | 68.8 (44.0–102.3)                       |
| NHW         | 19          | 7                | 27.2                            | 79.3 (31.9–163.4)                       |
| Hispanic    | 56          | 17               | 23.0                            | 65.2 (38.0–104.4)                       |
| Regression  | 75          | 13               | 13.3                            | 35.8 (19.0–61.2)                        |
| NHW         | 19          | 6                | 23.5                            | 66.9 (24.5–145.6)                       |
| Hispanic    | 56          | 7                | 9.7                             | 25.6 (10.3–52.7)                        |

Cumulative incidence is calculated directly from the incidence density rates (35). The ethnic group incidence density rates were compared via a binomial distribution test. Significance test results: for incidence,  $P = 0.38$ , for progression,  $P = 0.66$ , and for regression,  $P = 0.07$ .

last visit or an endpoint developed. Significance testing for these rates was assessed using an exact binomial test (PEPI computer program, Rates2 [34]). Cumulative incidence rates were calculated from these incidence density values using the equation  $CI_t = 1 - e^{-I \cdot t}$  (35), where  $CI$  is the cumulative incidence,  $t$  is time, and  $I$  is incidence density, for a 4-year period of follow-up to be comparable to those of Klein et al. (12).

All data were analyzed using Statistical Analysis Systems (SAS) statistical package software (SAS Institute, Cary, NC, Version 6 for Windows). Multiple logistic regression was used to assess the independent effect of potential risk factors.

Model fitting was accomplished in several steps. Initially a full model was fitted that included the independent variables sex, ethnicity, clinical age (assessed in 10-year increments), duration of type 2 diabetes (assessed in 5-year increments), diabetes treatment (insulin, oral agents, or none), systolic blood pressure, diastolic blood pressure, urine protein-to-creatinine ratio, serum triglyceride, total cholesterol, total HDL, family history of diabetes, and BMI. Time since a baseline visit was included in the models to account for differential follow-up time. Akaike's information criteria (36) was used as an indicator of model fit. Previous research has implicated potential interaction of ethnicity with smoking, ethnicity with type of diabetes treatment, and smoking with diabetes treatment (4,12) on retinopathy. These were assessed in the analyses and removed from the model one by one, starting with the term with the highest  $P$  value, and the effect on the  $-2$  log likelihood as a measure of model fit was

noted. None of the interaction terms were retained in later models due to lack of significance or inconsistent patterns in subgroups with small numbers. Next, main effects variables were removed individually, and the effect of their removal on the association between ethnicity and the dependent variable, retinopathy status, was noted. Age, sex, and ethnicity were retained in all models. In the multivariate models, time was not significantly related to the outcome. Inclusion of time did not alter the association between ethnicity and retinopathy. Development of retinopathy was also evaluated using Cox proportional hazards regression (Proc PHREG, Discrete ties) in SAS statistical software (SAS Institute, Version 6 for Windows), and the generally similar results are discussed in text only.

**RESULTS**—Table 2 summarizes the incidence, progression, and regression rates of a two-step change in retinopathy classification by ethnicity. There were 169 people with follow-up who were negative for retinopathy at baseline. The mean age was 58.1 years, with 56.4% of this group women, 64.8% Hispanics, and a mean duration of diabetes of 4.6 years. Of the 169 subjects, 47 developed retinopathy by the second follow-up visit, giving an overall incidence rate of 63.7/1,000 person-years (PY) and a 4-year cumulative incidence of 22.5%. Hispanics had an incidence rate of 58.3/1,000 PY (4-year cumulative incidence: 20.8%), whereas the incidence rate for NHWs was 76.1/1,000 PY (4-year cumulative incidence: 26.2%). Hispanic and NHW rates were not significantly different ( $P = 0.38$ ).

Table 3—Comparison of subjects with no follow-up to those with follow-up by ethnicity, San Luis Valley Diabetes Study, 1984–1992

| Risk factor                         | NHW follow-up |              |         | Hispanic follow-up |               |         |
|-------------------------------------|---------------|--------------|---------|--------------------|---------------|---------|
|                                     | No (n = 63)   | Yes (n = 72) | P value | No (n = 82)        | Yes (n = 172) | P value |
| Sex (% female)                      | 47.6          | 41.7         | 0.49    | 61.0               | 62.2          | 0.85    |
| Age (years)                         | 59.9          | 58.8         | 0.54    | 59.0               | 56.7          | 0.12    |
| Duration of type 2 diabetes (years) | 7.4           | 5.5          | 0.15    | 9.5                | 6.8           | 0.02    |
| Insulin treatment (%)               | 31.8          | 21.4         | 0.18    | 50.0               | 36.1          | 0.04    |
| Oral treatment (%)                  | 27.0          | 40.0         | 0.11    | 18.8               | 25.4          | 0.24    |
| Total GHb (%)                       | 9.9           | 9.7          | 0.66    | 10.5               | 10.0          | 0.11    |
| Systolic blood pressure (mmHg)      | 136.5         | 134.5        | 0.59    | 144.4              | 135.0         | 0.009   |
| Diastolic blood pressure (mmHg)     | 78.9          | 78.5         | 0.81    | 80.2               | 79.9          | 0.83    |
| BMI (kg/m <sup>2</sup> )            | 27.7          | 29.7         | 0.02    | 28.2               | 29.6          | 0.05    |
| Smoking ever (%)                    | 58.7          | 51.4         | 0.39    | 56.1               | 56.4          | 0.96    |
| Urine protein-to-creatinine ratio   | 0.15          | 0.10         | 0.02    | 0.24               | 0.13          | <0.001  |
| Family history of diabetes (%)      | 45.2          | 47.9         | 0.75    | 56.1               | 60.6          | 0.50    |
| Total cholesterol (mg/dl)           | 209.9         | 211.3        | 0.87    | 225.9              | 227.7         | 0.78    |
| HDL (mg/dl)                         | 40.0          | 43.2         | 0.18    | 46.1               | 44.2          | 0.33    |
| Triglycerides (mg/dl)               | 171.9         | 188.8        | 0.33    | 208.0              | 210.1         | 0.89    |
| Retinopathy                         |               |              |         |                    |               |         |
| None (grade 10–12) (%)              | 55.6          | 73.6         |         | 56.1               | 67.4          |         |
| Background (grade 15–30) (%)        | 22.2          | 23.6         | <0.001  | 17.1               | 22.1          | <0.001  |
| Preproliferative (grade 40) (%)     | 19.1          | 0            |         | 11.0               | 10.5          |         |
| Proliferative (grade 60+) (%)       | 3.2           | 2.8          |         | 15.9               | 0             |         |

P values are for  $\chi^2$  tests for categorical variables and *t* tests for continuous variables. Triglyceride levels and the urine protein-to-creatinine ratio were log-transformed, and geometric means are presented.

Progression of retinopathy was evaluated in those who had retinopathy present at any level at baseline (*n* = 139), of whom 75 returned for at least one follow-up visit. The median age of this group was 58.0 years, and the group was 54.7% women, with 66.2% of Hispanic ethnicity. The mean duration of diabetes in this group was 11.9 years. Of these 75 subjects, 24 were found to have deteriorated by more than two steps in the classification. The overall progression rate was 68.8/1,000 PY, a 4-year cumulative incidence of 24.1%. Hispanics had a somewhat lower rate of progression than did the NHWs, 65.2/1,000 vs. 79.3/1,000 PY (*P* = 0.66), with a 4-year cumulative incidence of 23.0% and 27.2%, respectively.

Regression was less common than either incidence or progression of retinopathy, with only 13 of the 75 subjects who were positive at baseline showing improvement by at least two steps. The overall regression rate was 35.8/1,000 PY, a 4-year cumulative incidence of 13.3%. Hispanics had a regression rate of 32.9/1,000 PY (4-year cumulative incidence of 9.7%) compared with the NHWs (66.9/1,000 PY, 4-year cumulative incidence of 23.5%; *P* = 0.07). Of the 13 subjects who exhibited regression, 9 (69.2%) had no retinopathy detected at fol-

low-up. None of these nine people ever exceeded a classification grade of 30.

Table 3 compares the risk factors at baseline by ethnicity for those subjects with no follow-up compared with subjects who had any follow-up. People who had no follow-up visits appeared to have more severe type 2 diabetes. They had a longer duration of diabetes and were more likely to be treated with insulin, have higher systolic blood pressure (Hispanics), and have more albuminuria. They also had more severe retinopathy at baseline.

Table 4 compares the distribution of risk factors at baseline by ethnicity for subjects free of retinopathy who had follow-up. Hispanic subjects were significantly more likely to be female and had higher total cholesterol and triglyceride levels than did NHW subjects. Hispanics were also more likely to be treated with insulin and had slightly higher GHb levels, though neither factor was statistically significant. No important differences in blood pressure, smoking, BMI, family history of diabetes, or urine protein-to-creatinine ratio were seen.

Table 5 shows the univariate association of potential risk factors for incidence of retinopathy among subjects who were negative for retinopathy at baseline and had follow-up visit(s). Higher total GHb, use of

insulin, and longer total time in the study were significantly associated with increased risk of retinopathy development. People with incident retinopathy had slightly higher blood pressures and longer duration of diabetes. Hispanic ethnicity was not significantly associated with retinopathy incidence (OR = 0.74, 95% CI 0.36–1.50).

Next, the pattern of association between the risk factor variables and the development of retinopathy was assessed using both logistic regression modeling and Cox proportional hazards modeling. Nine subjects were excluded from these analyses because of missing risk factor information, leaving 160 people to analyze for any incident retinopathy. Table 6 presents the logistic regression analysis for incident retinopathy. In the full model, treatment of diabetes with insulin (OR = 9.30, 2.69–32.16, *P* < 0.001) and systolic blood pressure (OR = 1.81, 1.02–3.20, *P* = 0.04) were significantly associated with the incidence of retinopathy (Table 6, model 1). A 2% increase in GHb was associated with retinopathy incidence at near-conventional levels of significance (OR = 1.50, 0.96–2.36, *P* = 0.08). Treatment of diabetes with insulin was also significantly associated with incident retinopathy (OR = 8.45, 2.65–29.97, *P* < 0.001) after adjust-

**Table 4—Distribution of risk factors by ethnicity among subjects free of retinopathy at baseline (n = 169), San Luis Valley Diabetes Study, 1984–1992**

| Participant characteristic          | NHW           | Hispanic      | P value |
|-------------------------------------|---------------|---------------|---------|
| n                                   | 53            | 116           |         |
| Sex (female) (%)                    | 37.7          | 65.5          | <0.001  |
| Age (years)                         | 58.7 ± 8.3    | 56.7 ± 10.3   | 0.20    |
| Duration of type 2 diabetes (years) | 3.7 ± 4.9     | 4.9 ± 6.4     | 0.18    |
| Insulin treatment                   | 13.7          | 21.1          | 0.26    |
| Oral treatment                      | 41.2          | 30.7          | 0.19    |
| Total GHb (%)                       | 9.0 ± 2.0     | 9.6 ± 2.2     | 0.08    |
| Systolic blood pressure (mmHg)      | 134.1 ± 18.0  | 133.0 ± 18.2  | 0.72    |
| Diastolic blood pressure (mmHg)     | 78.4 ± 8.2    | 79.7 ± 9.6    | 0.38    |
| BMI (kg/m <sup>2</sup> )            | 29.5 ± 5.2    | 29.8 ± 4.7    | 0.69    |
| Smoking ever (%)                    | 56.6          | 56.9          | 0.97    |
| Urine protein-to-creatinine ratio   | 0.10 ± 0.07   | 0.11 ± 0.09   | 0.14    |
| Family history of diabetes (%)      | 50.0          | 54.4          | 0.60    |
| Total cholesterol (mg/dl)           | 209.0 ± 52.1  | 229.3 ± 45.1  | 0.01    |
| Total HDL cholesterol (mg/dl)       | 44.0 ± 15.7   | 44.0 ± 15.0   | 0.98    |
| Triglycerides (mg/dl)               | 171.8 ± 100.4 | 216.1 ± 124.1 | 0.02    |

Data are n, %, or means ± SD. P value is reported for the ethnic contrast using *t* test or  $\chi^2$  test. Triglyceride levels and the urine protein-to-creatinine ratio were log-transformed, and geometric means are presented with approximate standard deviations.

ment for age, sex, ethnicity, duration of diabetes, systolic blood pressure, and total GHb (Table 6, model 2). Systolic blood pressure (OR = 1.58, 0.99–2.52, *P* = 0.06) and GHb level (OR = 1.46, 0.99–2.17, *P* = 0.06) were both associated with risk of retinopathy and nearly reached conventional levels of significance. In these multiply adjusted models, Hispanic ethnicity was not significant, and a slight protective effect for developing retinopathy was suggested compared with NHW subjects (OR = 0.66, 0.28–1.57, *P* = 0.35). Duration of diabetes was negatively but not significantly associated with retinopathy incidence in model 2 (OR = 0.88, 0.60–1.29, *P* = 0.51). Removal of the diabetes treatment variable caused this association to become positive (OR = 1.18, 95% CI 0.86–1.61) with minimal changes in the other ORs, suggesting confounding of duration with insulin treatment. Time until event from baseline showed no significant effects and was removed from the models. None of the interaction terms were significant in the reduced model.

To account for variable follow-up periods, we also used Cox proportional hazards models to verify the logistic regression results. The Cox model results were similar to those from the logistic models shown in Table 6. As in the logistic model, no significant difference was seen between Hispanic and NHW subjects (hazard ratio [HR] = 0.72, 0.37–1.42, *P* = 0.34), and insulin

treatment had the strongest association with incident retinopathy (HR = 4.5, 1.78–11.14, *P* value = 0.001). In the Cox

model, systolic blood pressure was also significantly associated with retinopathy incidence (HR = 1.2, 1.02–1.47, *P* value = 0.03). GHb level also increased risk but did not reach conventional levels of significance (HR = 1.2, 95% CI 0.99–1.33, *P* = 0.07). Although the pattern for duration of diabetes was similar between the logistic and Cox models, it was negatively and significantly associated with retinopathy in the Cox model (HR = 0.7, 0.52–0.97, *P* = 0.03). When diabetes treatment was removed from the Cox model, the HR increased toward 1.0 (HR = 0.84, 0.64–1.11, *P* = 0.23) and was no longer significant, suggesting some degree of confounding by treatment.

The pattern of associations of risk factors and progression and regression of retinopathy was also explored; however, the models were very unstable because of the small sample sizes (data not shown).

**CONCLUSIONS**— We found that Hispanics had an incidence rate of 58.3/1,000 PY for new retinopathy compared with NHWs with diabetes (76.1/1,000 PY); however, the incidence

**Table 5—Univariate results for potential baseline risk factors for incident retinopathy (n = 169), San Luis Valley Diabetes Study, 1984–1992**

| Risk factor (unit change)             | Positive for incident retinopathy | Negative for retinopathy | OR (95% CI)        |
|---------------------------------------|-----------------------------------|--------------------------|--------------------|
| n                                     | 47                                | 122                      | —                  |
| Ethnicity (Hispanic) (%)              | 63.8                              | 70.5                     | 0.74 (0.36–1.50)   |
| Sex (female) (%)                      | 46.8                              | 60.7                     | 0.57 (0.29–1.13)   |
| Age (10 years)                        | 56.8 ± 10.3                       | 57.5 ± 9.5               | 0.93 (0.66–1.31)   |
| Duration of type 2 diabetes (5 years) | 5.5 ± 5.3                         | 4.1 ± 6.2                | 1.19 (0.91–1.56)   |
| Insulin treatment (vs. none)          | 39.1                              | 10.9                     | 5.24 (2.30–11.97)* |
| Oral treatment (vs. none)             | 34.7                              | 33.6                     | 1.05 (0.52–2.16)   |
| Total GHb (2%)                        | 10.0 ± 2.2                        | 9.2 ± 2.1                | 1.45 (1.06–1.97)*  |
| Systolic blood pressure (20 mmHg)     | 135.1 ± 20.7                      | 132.7 ± 17.0             | 1.16 (0.80–1.67)   |
| Diastolic blood pressure (10 mmHg)    | 80.2 ± 8.5                        | 79.0 ± 9.4               | 1.15 (0.80–1.67)   |
| BMI (5 kg/m <sup>2</sup> )            | 28.8 ± 4.5                        | 30.1 ± 5.0               | 0.74 (0.51–1.07)   |
| Smoking ever (vs. never) (%)          | 63.8                              | 54.1                     | 1.50 (0.75–3.00)   |
| Urine protein-to-creatinine ratio     | 0.12 ± 0.10                       | 0.10 ± 0.14              | 1.15 (0.89–1.47)   |
| Family history of diabetes (%)        | 57.4                              | 51.3                     | 1.28 (0.65–2.54)   |
| Total cholesterol (50 mg/dl)          | 220.8 ± 42.4                      | 223.8 ± 50.4             | 0.94 (0.66–1.34)   |
| HDL (15 mg/dl)                        | 44.9 ± 18.6                       | 43.6 ± 13.7              | 1.09 (0.78–1.51)   |
| Triglycerides (0.25 mg/dl)            | 191.3 ± 106.8                     | 204.9 ± 122.3            | 0.88 (0.63–1.25)   |
| Time in study (years)                 | 5.2 (2.0–6.4)                     | 4.5 (2.0–6.6)            | 1.48 (1.13–1.95)*  |

Data are n, %, or means ± SD. Unit change shows the change in the variable reflected in the OR. Triglyceride levels and the urine protein-to-creatinine ratio were log-transformed, and geometric means are presented with approximate standard deviations. Odds ratios are for 0.25 U on the log-transformed scale. Time in study is presented with the range in parentheses, instead of SD. \*Statistically significant with a *P* value <0.05.

**Table 6—Analysis of risk factors for incidence of diabetic retinopathy among type 2 diabetes subjects free of retinopathy at baseline (n = 160), San Luis Valley Diabetes Study, 1984–1992**

| Factor                                        | Model 1           |         | Model 2           |         |
|-----------------------------------------------|-------------------|---------|-------------------|---------|
|                                               | OR (95% CI)       | P value | OR (95% CI)       | P value |
| Ethnicity                                     |                   |         |                   |         |
| NHW                                           | 1.00              |         | 1.00              |         |
| Hispanic                                      | 0.63 (0.25–1.59)  | 0.33    | 0.66 (0.28–1.57)  | 0.35    |
| Sex                                           |                   |         |                   |         |
| Male                                          | 1.00              |         | 1.00              |         |
| Female                                        | 0.57 (0.22–1.48)  | 0.25    | 0.63 (0.28–1.43)  | 0.27    |
| Age (10-year increase)                        | 0.80 (0.50–1.27)  | 0.34    | 0.86 (0.55–1.33)  | 0.49    |
| Duration of type 2 diabetes (5-year increase) | 0.84 (0.56–1.25)  | 0.38    | 0.88 (0.60–1.29)  | 0.51    |
| Diabetes treatment                            |                   |         |                   |         |
| No medications                                | 1.00              |         | 1.00              |         |
| Insulin treatment                             | 9.30 (2.69–32.16) | <0.001  | 8.45 (2.65–26.97) | <0.001  |
| Oral treatment                                | 2.00 (0.75–5.35)  | 0.17    | 1.88 (0.74–4.73)  | 0.18    |
| Total GHb (2% increase)                       | 1.50 (0.96–2.36)  | 0.08    | 1.46 (0.99–2.17)  | 0.06    |
| Systolic blood pressure (20 mmHg increase)    | 1.81 (1.02–3.20)  | 0.04    | 1.58 (0.99–2.52)  | 0.06    |
| Diastolic blood pressure (10 mmHg increase)   | 0.81 (0.47–1.38)  | 0.43    | —                 | —       |
| BMI (5 kg/m <sup>2</sup> increase)            | 0.79 (0.50–1.23)  | 0.29    | —                 | —       |
| Smoking status                                |                   |         |                   |         |
| Never smoked                                  | 1.00              |         |                   |         |
| Current or ever smoked                        | 1.23 (0.53–2.84)  | 0.63    | —                 | —       |
| Urine protein-to-creatinine ratio (0.25)      | 1.09 (0.80–1.50)  | 0.58    | —                 | —       |
| Family history of diabetes                    | 1.54 (0.67–3.52)  | 0.31    | —                 | —       |
| Cholesterol (50 mg/dl increase)               | 1.12 (0.69–1.82)  | 0.64    | —                 | —       |
| Total HDL cholesterol (15 mg/dl increase)     | 1.20 (0.74–1.93)  | 0.46    | —                 | —       |
| Triglycerides (0.25)                          | 1.08 (0.67–1.77)  | 0.75    | —                 | —       |

Table excludes nine subjects for whom treatment (2 Hispanic, 2 NHW), family history of diabetes (1 Hispanic, 2 NHW), HDL (1 Hispanic), or cholesterol and triglyceride (1 NHW) status was unknown. Triglyceride levels and the urine protein-to-creatinine ratio were log-transformed. ORs are for 0.25 U on the log-transformed scale.

rates between the two ethnic groups did not differ significantly. These incidence rates are better guides than prevalence to the true differences in retinopathy between populations, because incidence rates directly measure the risk of developing the complication over time. These results, like our prevalence data (4), suggest that Hispanics in the San Luis Valley do not have excess retinopathy risk compared with NHWs. Associations with glucose control, blood pressure, and insulin treatment were seen in both ethnic groups but did not confound the lack of difference between Hispanics and NHWs. We have also recently reported that Hispanics have no excess risk for another microvascular complication, distal symmetric sensory neuropathy (37).

Epidemiological studies that have investigated the incidence of retinopathy in several populations are summarized in Table 7. The rates ranged from 15.6/1,000 PY in Rochester, Minnesota, using routine care follow-up to 157.0/1,000 PY in the Caucasian population of the Wisconsin Epidemiologic Study of Diabetic Retinopathy (WESDR) (38) and 170.3/1,000 PY in a small number of insulin-taking Pima Indians (17). In the present study, the overall rate of any new retinopathy development was 76.1/1,000 PY among NHWs, similar to rates seen in Denmark and Taiwan. Lower rates in our study than in the WESDR could have been due to less complete follow-up of people with more severe diabetes, use of only three-field versus seven-field photographs (39), or other fac-

tors. Because our NHW subjects were less likely to return for repeat visits, our rates are likely underestimates of the true rates in this group compared with WESDR.

The San Antonio Heart Study previously reported a higher prevalence of retinopathy in Mexican-Americans compared with NHWs (6). They found no effect of low socioeconomic status on retinopathy prevalence (16) and similar effects of glycemia, duration, insulin therapy, and blood pressure in both Mexican-Americans and Caucasians in the WESDR (40). Thus, their risk factor results are similar to ours but do not explain why they found excess prevalence in Mexican-Americans, whereas we saw no excess prevalence (4) or incidence in San Luis Valley Hispanic subjects. Differences in medical care access and therapy might be one reason, considering that Pugh et al. (41) have shown a relationship of greater retinopathy prevalence among people without health insurance or with less comprehensive ambulatory care coverage. In the San Luis Valley, medical care is generally available to people of low income through a rural community health center network. Hispanic people have nearly identical patterns of physician and hospital visits compared with NHW people in this area (data not shown). Such medical care patterns may be quite different in urban areas. Of course, other differences may exist that could alter retinopathy risk, such as unmeasured environmental, medical, or genetic factors between these Hispanic subpopulations.

In both ethnic groups, insulin therapy was positively associated with an increased incidence of retinopathy. The positive association of insulin therapy with incident retinopathy may suggest that diabetic subjects who take insulin had more severe disease. Insulin users had younger age at onset (45.9 vs. 54.0 years,  $P < 0.001$ ), longer duration (9.2 vs. 3.5 years,  $P = 0.0003$ ), and higher GHb levels (10.3 vs. 9.1%,  $P = 0.004$ ), but they had a similar prevalence of hypertension (66.9 vs. 65.5%,  $P = 0.77$ ). Systolic blood pressure and GHb level were associated with increased incidence rates of retinopathy in our study (though not reaching conventional levels of significance because of the small number of subjects), which is compatible with previous studies (13,15,17–20,42,43). The negative association of diabetes duration that was found using both the logistic (nonsignificant) and Cox (significant) models could have been an anomalous result, because those sub-

Table 7—Comparison of studies on incidence and progression of diabetic retinopathy in subjects with type 2 diabetes

| Study (reference)                                | n     | Age-group (years)          | Ethnicity                                                        | Study duration (years) | Cumulative progression (%) | Cumulative incidence (%) | Incidence density (per 1,000 PY) | Methods                                                  |
|--------------------------------------------------|-------|----------------------------|------------------------------------------------------------------|------------------------|----------------------------|--------------------------|----------------------------------|----------------------------------------------------------|
| San Luis Valley Diabetes Study (current results) | 244   | 20–74                      | NHW<br>Hispanic<br>Total                                         | 4                      | 27.2<br>23.0<br>24.1       | 26.2<br>20.8<br>22.5     | 76.1<br>58.3<br>63.7             | Photographs (3 fields)*                                  |
| WESDR (12)                                       | 1,370 | 30–74                      | Caucasian                                                        | 4                      | 29.1                       | 38.6                     | 119.0                            | Photographs (7 fields)†                                  |
| WESDR (38)                                       | 533   | 30–74 (onset at 30+ years) | Caucasian<br>Insulin<br>No insulin                               | 10                     | 68.7<br>52.9               | 79.2<br>66.9             | 157.0<br>110.6                   | Photographs (7 fields)†                                  |
| Denmark (45)                                     | 215   | 3–90 (median 51)           | Caucasian<br>Insulin                                             | 1                      | 25.9                       | 11.1                     | 118.0                            | Photographs (2 fields)<br>Ophthalmoscopy                 |
| Denmark (46)                                     | 273   | 35–92 (median 71)          | Caucasian<br>Oral agent                                          | 1                      | 21.1                       | 7.9                      | 82.3                             | Photographs (2 fields)<br>Ophthalmoscopy                 |
| Taiwan (47)                                      | 464   | 40+ (mean 60.4)            | Taiwanese                                                        | 4                      | 30.0                       | 19.2                     | 53.3                             | Ophthalmoscopy yearly                                    |
| Rochester, MN (48)                               | 1,031 | <30 to 70+                 | Caucasian<br>Type 2                                              | 4                      | —                          | 6.1                      | 15.6                             | Photographs/<br>Ophthalmoscopy in routine care           |
| Pima Indian (17)                                 | 188   | 25+                        | Pima Indian<br>Oral agent (n = 163)<br>Insulin (n = 25)<br>Total | 4                      | —<br>—<br>—                | 16.7<br>49.4<br>22.1     | 45.7<br>170.3<br>62.3            | Ophthalmoscopy; hemorrhages plus neovascularization only |
| American Indians in Oklahoma (49)                | 332   | All ages (mean 52)         | American Indian                                                  | 12.8                   | —                          | 72.3                     | 100.3                            | Ophthalmoscopy by specialist                             |

\*Graded with condensed Modified Airlie House classification; †graded with adaptation to Modified Airlie House classification.

jects with follow-up had type 2 diabetes for a shorter duration (6.4 vs. 8.6 years). A similar trend of reduced incidence rates with increasing diabetes duration was also noted by Klein et al. in the WESDR (38). It is possible that biological differences exist between subjects; that is, those individuals most susceptible to retinopathy will develop it rapidly, leaving those without retinopathy at a lower risk upon follow-up. Because we only explored incidence among people without retinopathy at baseline, this group may have been enriched with subjects less likely to develop retinopathy later. Further study on larger cohorts will be required to explore this observation.

A primary limitation of this study is the bias toward differential survivorship. Older subjects and those subjects with longer duration of diabetes and indications of more severe disease predominate in the group that died or did not return for follow-up. Those continuing in follow-up were younger and healthier, which may result in an underestimate of retinopathy incidence and progression. Losses to follow-up also left us with relatively small

numbers at risk and reduced power to detect true associations between the risk factors and the incidence and progression of retinopathy.

In summary, although Hispanic populations have been shown to have an increased risk for type 2 diabetes itself (5,44), they do not have excess risk for microvascular complications associated with type 2 diabetes, including retinopathy and peripheral neuropathy (37) in this population. From a health services perspective, these data contribute to estimates of the risk of developing retinopathy in a population with diabetes and can serve as an estimate of need for retinopathy treatment services and for planning screening and/or treatment programs.

**Acknowledgments**— This study was supported by National Institutes of Health Grants DK-30747 and CRC-RR-00051.

The authors gratefully acknowledge the contributions of the residents of Alamosa and Conejos counties, the medical personnel and staff of the area, the core staff of the San Luis Valley Diabetes Study, the University of Wisconsin

Fundus Photography Reading Center, Dr. Ronald Klein for helpful insights, and Dr. George Moo-Young.

## References

1. Klein R, Klein BEK: Vision disorders in diabetes. In *Diabetes in America*. 2nd ed. National Diabetes Data Group, Ed. Washington, DC, U.S. Govt. Printing Office, 1995, p. 293–338
2. Kahn HA, Hiller R: Blindness caused by diabetic retinopathy. *Am J Ophthalmol* 78:58–67, 1974
3. Klein R, Klein BE, Moss SE: Visual impairment in diabetes. *Ophthalmology* 91:1–9, 1984
4. Hamman RF, Mayer ES, Moo-Young G, Hildebrandt W, Marshall JA, Baxter J: Prevalence and risk factors of diabetic retinopathy in non-Hispanic whites and Hispanics with NIDDM: the San Luis Valley Diabetes Study. *Diabetes* 38:1231–1237, 1989
5. Stern MP, Mitchell BD: Diabetes in Hispanic Americans. In *Diabetes in America*. 2nd ed. National Diabetes Data Group, Ed. Washington, DC, U.S. Govt. Printing Office, 1995, p. 631–659
6. Haffner SM, Fong D, Stern MP, Pugh JA,

- Hazuda HP, Patterson JK, van Heuven WA, Klein R: Diabetic retinopathy in Mexican Americans and non-Hispanic whites. *Diabetes* 37:878-884, 1988
7. Lee ET, Lee VS, Lu M, Russell D: Development of proliferative retinopathy in NIDDM: a follow-up study of American Indians in Oklahoma. *Diabetes* 41:359-367, 1992
8. Nelson RG, Wolfe JA, Horton MB, Pettitt DJ, Bennett PH, Knowler WC: Proliferative retinopathy in NIDDM: incidence and risk factors in Pima Indians. *Diabetes* 38:435-440, 1989
9. Fujimoto WY, Leonetti DL, Kinyoun JL, Shuman WP, Stolov WC, Wahl PW: Prevalence of complications among second-generation Japanese-American men with diabetes, impaired glucose tolerance, or normal glucose tolerance. *Diabetes* 36:730-739, 1987
10. Sasaki A, Horiuchi N, Hasegawa K, Uehara M: Development of diabetic retinopathy and its associated risk factors in type 2 diabetic patients in Osaka district, Japan: a long-term prospective study. *Diabetes Res Clin Pract* 10:257-263, 1990
11. Collins VR, Dowse GK, Plehwe WE, Imo TT, Toelupe PM, Taylor HR, Zimmet PZ: High prevalence of diabetic retinopathy and nephropathy in Polynesians of Western Samoa. *Diabetes Care* 18:1140-1149, 1995
12. Klein R, Klein BE, Moss SE, Davis MD, DeMets DL: The Wisconsin Epidemiologic Study of Diabetic Retinopathy. X. Four-year incidence and progression of diabetic retinopathy when age at diagnosis is 30 years or more. *Arch Ophthalmol* 107:244-249, 1989
13. Klein R, Klein BE, Moss SE, Davis MD, DeMets DL: The Wisconsin Epidemiologic Study of Diabetic Retinopathy. III. Prevalence and risk of diabetic retinopathy when age at diagnosis is 30 or more years. *Arch Ophthalmol* 102:527-532, 1984
14. Dorf A, Ballintine EJ, Bennett PH, Miller M: Retinopathy in Pima Indians: relationships to glucose level, duration of diabetes, age at diagnosis of diabetes, and age at examination in a population with a high prevalence of diabetes mellitus. *Diabetes* 25:554-560, 1976
15. West KM, Erdreich LJ, Stober JA: A detailed study of risk factors for retinopathy and nephropathy in diabetes. *Diabetes* 29:501-508, 1980
16. Haffner SM, Hazuda HP, Stern MP, Patterson JK, VanHeuven WJ, Fong D: Effect of socioeconomic status on hyperglycemia and retinopathy levels in Mexican Americans with NIDDM. *Diabetes Care* 12:128-134, 1989
17. Knowler WC, Bennett PH, Ballintine EJ: Increased incidence of retinopathy in diabetics with elevated blood pressure: a six-year follow-up study in Pima Indians. *N Engl J Med* 302:645-650, 1980
18. Knuiman MW, Welborn TA, McCann VJ, Stanton KG, Constable IJ: Prevalence of diabetic complications in relation to risk factors. *Diabetes* 35:1332-1339, 1986
19. Nathan DM, Singer DE, Godine JE, Harrington CH, Perlmuter LC: Retinopathy in older type II diabetics: association with glucose control. *Diabetes* 35:797-801, 1986
20. The Diabetes Control and Complications Trial Research Group: The relationship of glycemic exposure (HbA<sub>1c</sub>) to the risk of development and progression of retinopathy in the Diabetes Control and Complications Trial. *Diabetes* 44:968-983, 1995
21. Hamman RF, Marshall JA, Baxter J, Kahn LR, Mayer EJ, Orleans M, Murphy JR, Lezotte DC: Methods and prevalence of non-insulin-dependent diabetes mellitus in a biethnic Colorado population: the San Luis Valley Diabetes Study. *Am J Epidemiol* 129:295-311, 1989
22. World Health Organization: *Diabetes Mellitus: Report of a WHO Study Group*. Geneva, World Health Org., 1985 (Tech. Rep. Ser., no. 727)
23. *SAS Procedures Guide for Personal Computers*, Ver. 6. Cary, NC, SAS Institute, 1985
24. Early Treatment Diabetic Retinopathy Study Research Group: Grading diabetic retinopathy from stereoscopic color fundus photographs: an extension of the modified Airlie House classification. ETDRS report number 10. Early Treatment Diabetic Retinopathy Study Research Group. *Ophthalmology* 98:786-806, 1991
25. Klein R, Klein BE, Magli YL, Brothers RJ, Meuer SM, Moss SE, Davis MD: An alternative method of grading diabetic retinopathy. *Ophthalmology* 93:1183-1187, 1986
26. Diabetic Retinopathy Study Research Group: Report 7: a modification of the Airlie House classification of diabetic retinopathy. *Invest Ophthalmol Vis Sci* 21:210-226, 1981
27. U.S. Department of Commerce, Bureau of the Census: *1980 Census of Population, Vol. 1, General Social and Economic Characteristics of the Population*. Washington, DC, U.S. Government Printing Office, 1983 (Colorado PC80-1-C7)
28. Gay EC, Cruickshanks KJ, Chase HP, Klingensmith GJ, Hamman RF: Accuracy of a filter paper method for measuring glycosylated hemoglobin. *Diabetes Care* 15:108-110, 1992
29. Joint National Committee on Detection, Evaluation, and Treatment of High Blood Pressure: *The Fifth Report of the Joint National Committee on Detection, Evaluation, and Treatment of High Blood Pressure*. Bethesda, MD, National Institutes of Health, National Heart, Lung, and Blood Institute, 1993
30. Bennett PH: Recommendations on the standardization of methods and reporting of tests for diabetes and its microvascular complications in epidemiologic studies. *Diabetes Care* 2:98-104, 1979
31. Stavropoulos WS, Crouch RD: A new calorimetric procedure for the determination of serum triacylglycerol (Abstract). *Clin Chem* 20:857, 1974
32. Richmond W: Preparation and properties of a cholesterol oxidase from *Nocardia* sp. and its application to the enzymatic assay of total cholesterol in serum. *Clin Chem* 19:1350-1356, 1973
33. Warnick GR, Benderson J, Alber JJ: Dextran sulfate-Mg<sup>2+</sup> precipitation procedures for quantitation of high-density-lipoprotein cholesterol. *Clin Chem* 23:1379-1388, 1982
34. Gahlinger PM, Abramson JH: PEPI: computer programs for epidemiologic analysis. Stone Mountain, GA, USD, 1996
35. Rothman KJ: *Modern Epidemiology*. Boston, MA, Little, Brown, 1986
36. Sakamoto Y, Ishiguro M, Kitagawa G: Akaike information criterion. In *Akaike Information Criterion Statistics*. Tokyo, KTK Scientific, 1986, p. 56-85
37. Sands ML, Shetterly SM, Franklin GM, Hamman RF: Incidence of distal symmetric (sensory) neuropathy in NIDDM: the San Luis Valley Diabetes Study. *Diabetes Care* 20:322-329, 1997
38. Klein R, Klein BE, Moss SE, Cruickshanks KJ: The Wisconsin Epidemiologic Study of Diabetic Retinopathy. XIV. Ten-year incidence and progression of diabetic retinopathy. *Arch Ophthalmol* 112:1217-1228, 1994
39. Klein R, Klein BE, Neider MW, Hubbard LD, Meuer SM, Brothers RJ: Diabetic retinopathy as detected using ophthalmoscopy, a nonmydriatic camera, and a standard fundus camera. *Ophthalmology* 92:485-491, 1985
40. Haffner SM, Mitchell BD, Moss SE, Stern MP, Hazuda HP, Patterson J, van Heuven WA, Klein R: Is there an ethnic difference in the effect of risk factors for diabetic retinopathy? *Ann Epidemiol* 3:2-8, 1993
41. Pugh JA, Tuley MR, Hazuda HP, Stern MP: The influence of outpatient insurance coverage on the microvascular complications of non-insulin-dependent diabetes in Mexican Americans. *J Diabetes Complications* 6:236-241, 1992
42. Barnett AH, Britton JR, Leatherdale BA: Study of possible risk factors for severe retinopathy in non-insulin dependent diabetes. *Br Med J (Clin Res Ed)* 287:529, 1983
43. Klein R, Klein BE, Moss SE, Davis MD, DeMets DL: Is blood pressure a predictor of the incidence or progression of diabetic retinopathy? *Arch Intern Med* 149:2427-2432, 1989
44. Baxter J, Hamman RF, Lopez TK, Marshall JA, Hoag S, Swenson CL: Excess incidence of known non-insulin-dependent diabetes mellitus (NIDDM) in Hispanics compared with non-Hispanic whites in the San Luis Valley, Colorado. *Ethnic Dis* 3:11-21, 1993
45. Nielsen NV: Diabetic retinopathy. I. The



- course of retinopathy in insulin-treated diabetics: a one year epidemiological cohort study of diabetes mellitus: the Island of Falster, Denmark. *Acta Ophthalmol* 62: 256-265, 1984
46. Nielsen NV: Diabetic retinopathy. II. The course of retinopathy in diabetics treated with oral hypoglycaemic agents and diet regime alone: a one year epidemiological cohort study of diabetes mellitus: the Island of Falster, Denmark. *Acta Ophthalmol* 62: 266-273, 1984
  47. Chen MS, Kao CS, Fu CC, Chen CJ, Tai TY: Incidence and progression of diabetic retinopathy among non-insulin-dependent diabetic subjects: a 4-year follow-up. *Int J Epidemiol* 24:787-795, 1995
  48. Dwyer MS, Melton LJ, Ballard DJ, Palumbo PJ, Trautmann JC, Chu C-P: Incidence of diabetic retinopathy and blindness: a population-based study in Rochester, Minnesota. *Diabetes Care* 8:316-322, 1985
  49. Lee ET, Lee VS, Kingsley RM, Lu M, Russell D, Asal NR, Wilkinson CP, Bradford RH Jr: Diabetic retinopathy in Oklahoma Indians with NIDDM. *Diabetes Care* 15:1620-1627, 1992
